# Supplementary material for: The Pharmaceutical Ability of Pistacia lentiscus L. Leaves Essential Oil Against Periodontal Bacteria and Candida sp. and Its Anti-Inflammatory Potential
Source: Antibiotics (Basel). 2020 May 26;9(6):281. doi: 10.3390/antibiotics9060281 (PMC7345856; doi:10.3390/antibiotics9060281)
Supplement: Supplementary file 1 [file antibiotics-09-00281-s001.pdf]

***The pharmaceutical ability of Pistacia lentiscus L. leaves essential oil against periodontal bacteria and Candida sp. and its anti-inflammatory potential***

Egle Milia, Marianna Usai, Barbora Szotakova, Marie Elstnerova, Věra Králová, Guy D'hallewin, Ylenia Spissu, Antonio Barberis, Mauro Marchetti, Antonella Bortone, Vincenzo Campanella, Giorgio Mastandrea, Lenka Langhansova, Sigrun Eick

**Supplementary Material**

**Cyclic voltammetries of the three most represented phenolics of *Pistacia lentiscus L.* essential oil**

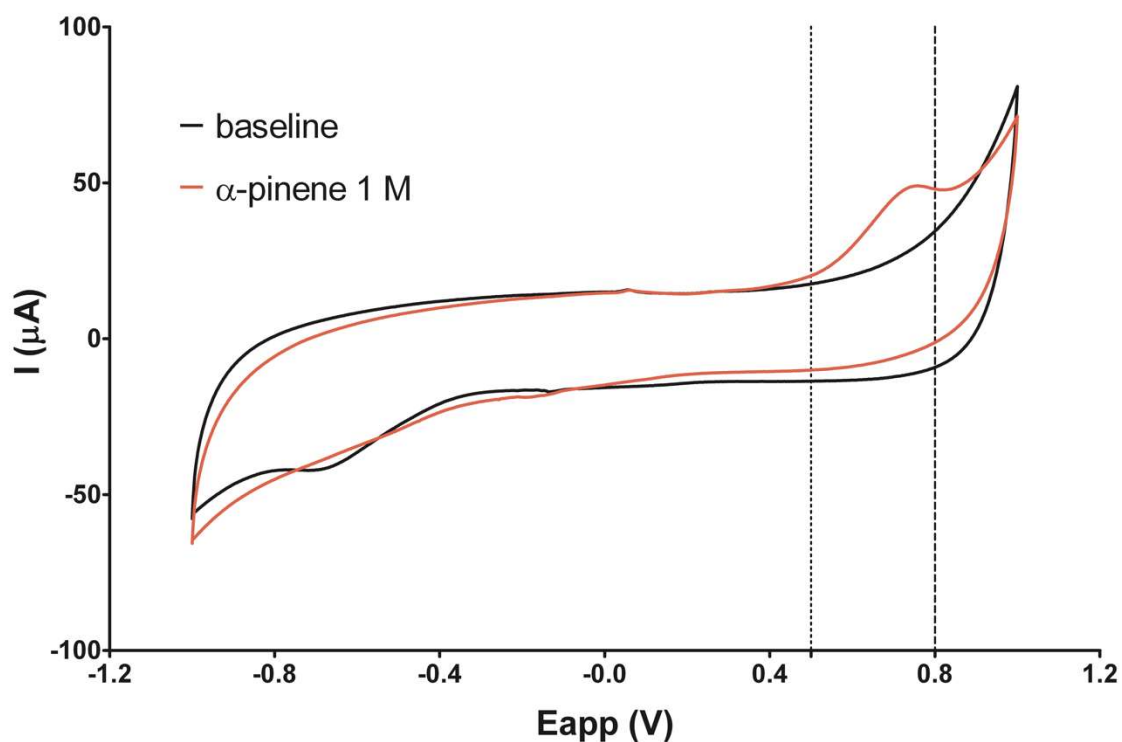

Figure S1. Cyclic voltammetry of  $\alpha$ -pinene with a scanned potential range ( $E_{\text{app}}$ ) comprised between - 1 V and + 1 V vs Ag/AgCl reference electrode, in the absence (black line) and in the presence of 1M  $\alpha$ -pinene (red line).

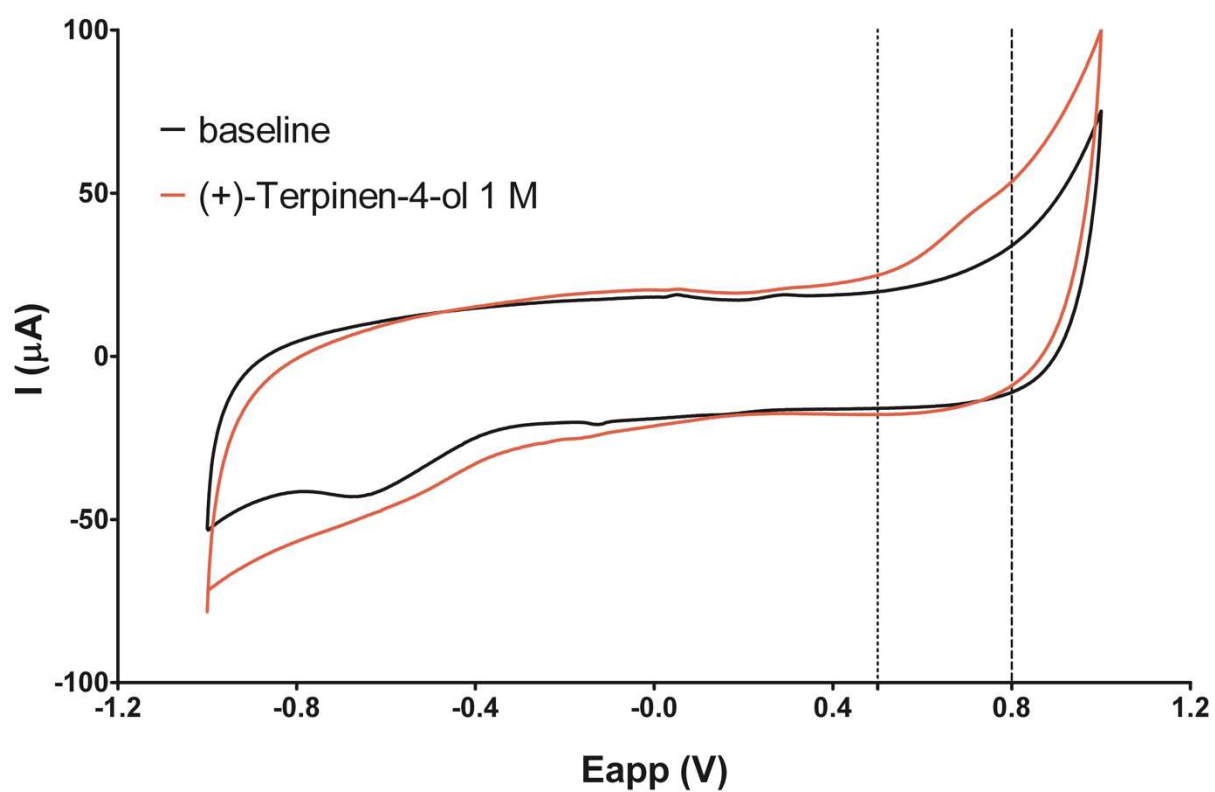

Figure S2. Cyclic voltammetry of terpinen-4-ol with a scanned potential range ( $E_{app}$ ) comprised between - 1 V and + 1 V vs Ag/AgCl reference electrode, in the absence (black line) and in the presence of 1M terpinen-4-ol (red line).

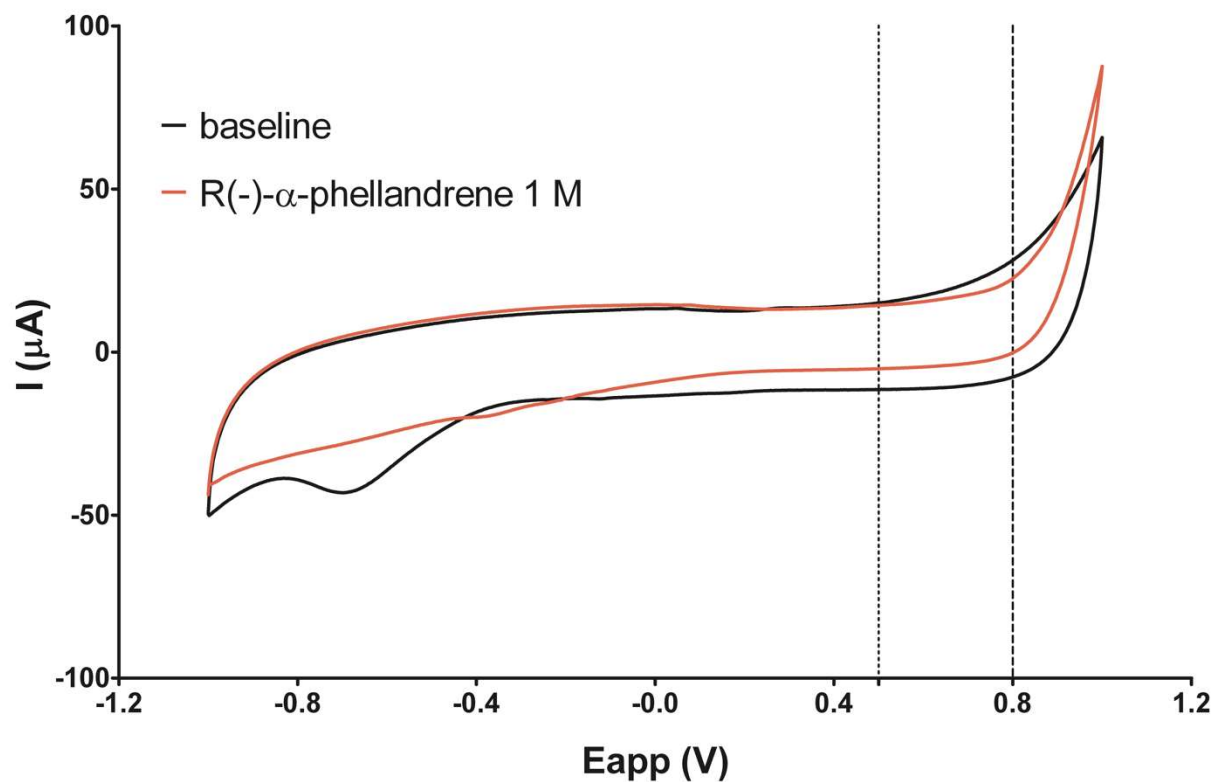

Figure S3. Cyclic voltammetry of  $\alpha$ -phellandrene with a scanned potential range ( $E_{\text{app}}$ ) comprised between - 1 V and + 1 V vs Ag/AgCl reference electrode, in the absence (black line) and in the presence of 1M  $\alpha$ -phellandrene (red line).
